# Supplementary material
Source: MDPI journal article supplement (https://www.mdpi.com/2073-4395/9/12/818)
Supplement: s1 [file s1]

# Supplementary Materials:

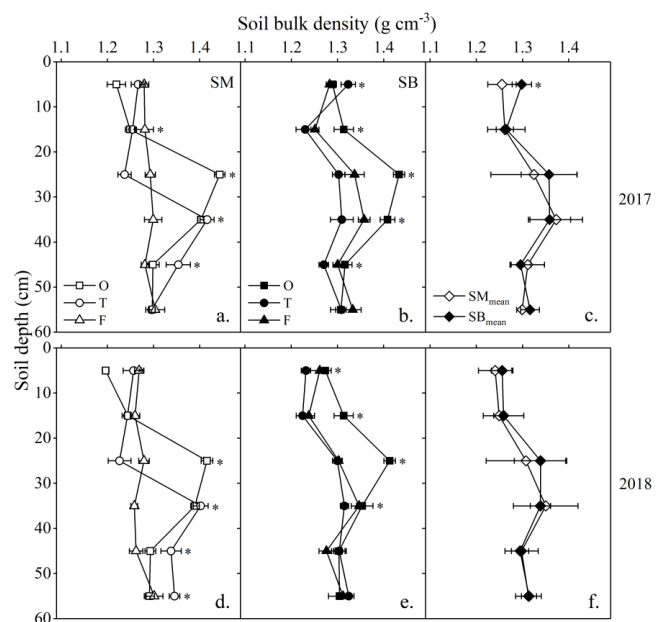

Figure S1. Changes in soil bulk density in the 0–60 cm profile under different straw returning approaches in 2017 and 2018. SM and SB indicate straw mixed with soil and buried in the soil; O, T, and F indicate straw incorporated into the soil (mixed or buried) at depths of 10, 30, and 50 cm, respectively.  $SM_{mean}$  is the mean of SM+O, SM+T, and SM+F;  $SB_{mean}$  is the mean of SB+O, SB+T, and SB+F; \* indicates significant differences ( $P < 0.05$ ) between straw incorporation depths (treatments) in the same soil layer.
